# Supplementary material for: A hierarchical system of covalent and dual non-covalent crosslinks promotes the toughness and self-healing properties of polymer hydrogels
Source: Royal Society of Chemistry journal article supplement (doi:10.1039/d2tb00737a), 2022-01-01
Supplement: d2tb00737a1.pdf [file d2tb00737a1.pdf]

## Electronic Supporting Information

for

### **Hierarchical system of covalent and dual non-covalent crosslinks promotes the toughness and self-healing properties of polymer hydrogels**

Yinlei Lin<sup>\*a,b</sup>, Zexian Ou<sup>a,d</sup>, Shuoqi Wang<sup>a</sup>, Sheng Sun<sup>a</sup>, Xiaoting Liu<sup>a</sup>, Xinyan Song<sup>c</sup>, Haichen Zhang<sup>a</sup>,  
Huawen Hu<sup>\*a,b</sup> and Guangji Li<sup>c</sup>

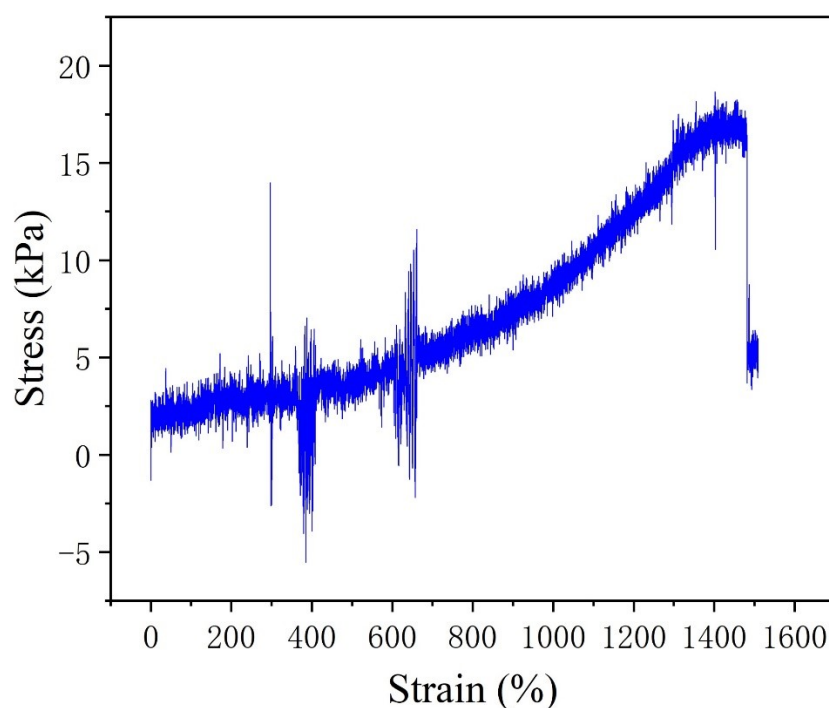

**Figure S1.** Stress-strain curve of the cut sample after self-healing treatment via contacting the cut parts for 30 min at ambient temperature.
